# Supplementary material for: ZG16 regulates PD-L1 expression and promotes local immunity in colon cancer
Source: PubMed Central journal article supplement — Transl Oncol. 2020 Dec 25;14(2):101003. doi: 10.1016/j.tranon.2020.101003 (PMC7773682; doi:10.1016/j.tranon.2020.101003), 2020-12-25

郑州大学生命科学伦理审查委员会  
伦理审查报告

项目名称: Zg16 对结肠癌局部微环境及免疫调控的作用及其与 pd-11 表达的相关性。

项目负责人: 孟辉

**伦理审查意见:**

经郑州大学生命科学伦理审查委员会审查, 该项目研究内容和过程遵循国际及国家颁布的有关生物医学研究的伦理要求, 同意该项目申请 2018 河南医学科技攻关项目。

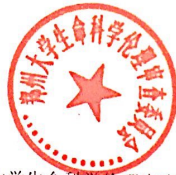

郑州大学生命科学伦理审查委员会

2018 年 3 月 16 日

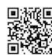

**Project Name: ZG16 regulates PD-L1 expression and promotes  
Local Immunity in Colon Cancer**

**Project leader: Hui Meng**

**Ethics Review Opinion:**

The research contents and process of the project were reviewed by the Life Science Ethics Review Committee of Zhengzhou University. The project was approved to apply for the 2018 Henan Medical Science and Technology project in accordance with the international and national ethical requirements on biomedical research.

Life Science Ethics Review Committee of Zhengzhou University

March 16,2018

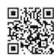

Supplement: mmc2.pdf [file mmc2.pdf]
